# Supplementary material for: New hydrogen carbonate precursors for efficient and byproduct-free syntheses of ionic liquids based on 1,2,3-trimethylimidazolium and N,N-dimethylpyrrolidinium cores
Source: Royal Society of Chemistry journal article supplement (doi:10.1039/b920003g), 2010-01-01
Supplement: b920003g.pdf [file b920003g.pdf]

ESI

**New Hydrogen Carbonate Precursors for Efficient and Byproduct-Free Syntheses of Ionic Liquids Based on 1,2,3-Trimethylimidazolium and *N,N*-Dimethylpyrrolidinium Cores**

Marcin Smiglak, C. Corey Hines,<sup>1</sup> and Robin D. Rogers\*

*Center for Green Manufacturing and Department of Chemistry, The University of Alabama, Tuscaloosa, AL 35487, USA*

---

<sup>1</sup>Current Address: Nuclear Radiation Center, Washington State University, Pullman, WA 99164.

**Table S1.** NMR shifts of [1,2,3-triMeIM][MeCO<sub>3</sub>] and [1,2,3-triMeIM][HCO<sub>3</sub>] salts.

| Sample Used                                                                         | Entry    | Solvent           | Analyzed nuclei and time after dissolution | NMR shifts (ppm)           |                           |        |                          |              |        |                   |                  |
|-------------------------------------------------------------------------------------|----------|-------------------|--------------------------------------------|----------------------------|---------------------------|--------|--------------------------|--------------|--------|-------------------|------------------|
|                                                                                     |          |                   |                                            | C2- <u>CH</u> <sub>3</sub> | N- <u>CH</u> <sub>3</sub> | C4/C5  | MeCO <sub>3</sub>        | MeOH         | C2     | MeCO <sub>3</sub> | HCO <sub>3</sub> |
| 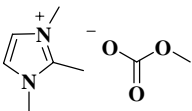   | <b>a</b> | CDCl <sub>3</sub> | <sup>1</sup> H after 10 min                | 2.74                       | 3.94                      | 7.74   | 3.45                     | trace @ 3.34 | N/A    | N/A               | N/A              |
|                                                                                     | <b>b</b> | CDCl <sub>3</sub> | <sup>13</sup> C after 10 min               | 9.52                       | 35.16                     | 122.69 | 52.02                    | ---          | 143.99 | 157.98            | ---              |
|                                                                                     | <b>c</b> | CDCl <sub>3</sub> | <sup>1</sup> H after 24 h                  | 2.72 (H-D exchange)        | 3.94                      | 7.71   | 3.45 (75%)               | 3.35 (25%)   | N/A    | N/A               | N/A              |
|                                                                                     | <b>d</b> | CDCl <sub>3</sub> | <sup>13</sup> C after 24 h                 | 9.16                       | 35.25                     | 122.67 | 52.03                    | 49.63        | 144.02 | 158.03            | ---              |
|                                                                                     | <b>e</b> | D <sub>2</sub> O  | <sup>1</sup> H after 10 min                | 2.58                       | 3.78                      | 7.30   | 3.54                     | 3.37         | N/A    | N/A               | N/A              |
|                                                                                     | <b>f</b> | D <sub>2</sub> O  | <sup>1</sup> H after 1 h                   | 2.57                       | 3.77                      | 7.30   | ---                      | 3.37         | N/A    | N/A               | N/A              |
|                                                                                     | <b>g</b> | D <sub>2</sub> O  | <sup>13</sup> C after 1 h                  | 9.30                       | 35.21                     | 122.43 | ---                      | 49.58        | 145.39 | ---               | 160.94           |
|                                                                                     | <b>h</b> | MeOD              | <sup>1</sup> H after 10 min                | 2.50                       | 3.71                      | 7.35   | 3.24                     | ---          | N/A    | N/A               | N/A              |
|                                                                                     | <b>i</b> | MeOD              | <sup>13</sup> C after 10 min               | 9.34                       | 35.42                     | 123.35 | 49.90                    | ---          | 146.52 | 161.37            | ---              |
|  | <b>j</b> | D <sub>2</sub> O  | <sup>1</sup> H after 10 min                | 2.57                       | 3.78                      | 7.30   | ---                      | ---          | N/A    | N/A               | N/A              |
|                                                                                     | <b>k</b> | D <sub>2</sub> O  | <sup>13</sup> C after 10 min               | 9.41                       | 35.32                     | 122.55 | ---                      | ---          | 145.50 | ---               | 161.03           |
|                                                                                     | <b>l</b> | MeOD              | <sup>1</sup> H after 10 min                | 2.51                       | 3.72                      | 7.36   | trace @ 3.24 (after 1 h) | ---          | N/A    | N/A               | N/A              |
|                                                                                     | <b>m</b> | MeOD              | <sup>13</sup> C after 10 min               | 9.37                       | 35.44                     | 123.35 | ---                      | ---          | 146.48 | ---               | 161.32           |

**Table S2.** NMR shifts of [*N,N*-diMePyr][HCO<sub>3</sub>] salts.

| Sample Used                                                                       | Entry    | Solvent          | Analyzed nuclei and time after dissolution | NMR shifts (ppm)                 |                   |                   |                   |      |                   |                  |
|-----------------------------------------------------------------------------------|----------|------------------|--------------------------------------------|----------------------------------|-------------------|-------------------|-------------------|------|-------------------|------------------|
|                                                                                   |          |                  |                                            | CH <sub>2</sub> -CH <sub>2</sub> | N-CH <sub>3</sub> | N-CH <sub>2</sub> | MeCO <sub>3</sub> | MeOH | MeCO <sub>3</sub> | HCO <sub>3</sub> |
| 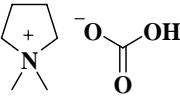 | <b>a</b> | D <sub>2</sub> O | <sup>1</sup> H after 10 min                | 2.23                             | 3.14              | 3.51              | ---               | ---  | N/A               | N/A              |
|                                                                                   | <b>b</b> | D <sub>2</sub> O | <sup>13</sup> C after 10 min               | 21.65                            | 51.67             | 65.82             | ---               | ---  | ---               | 160.17           |
|                                                                                   | <b>c</b> | DMSO             | <sup>1</sup> H after 10 min                | 2.08                             | 3.05              | 3.42              | ---               | ---  | N/A               | N/A              |
|                                                                                   | <b>d</b> | DMSO             | <sup>13</sup> C after 10 min               | 21.76                            | 51.50             | 65.33             | ---               | ---  | ---               | 158.93           |
